# Supplementary material for: Oncolytic Activity of Targeted Picornaviruses Formulated as Synthetic Infectious RNA
Source: PubMed Central journal article supplement (PMC7276391; doi:10.1016/j.omto.2020.05.003), 2020-05-19
Supplement: mmc1.pdf [file mmc1.pdf]

**OMTO, Volume 17**

**Supplemental Information**

**Oncolytic Activity of Targeted Picornaviruses**

**Formulated as Synthetic Infectious RNA**

**Noura B. Elsedawy, Rebecca A. Nace, Stephen J. Russell, and Autumn J. Schulze**

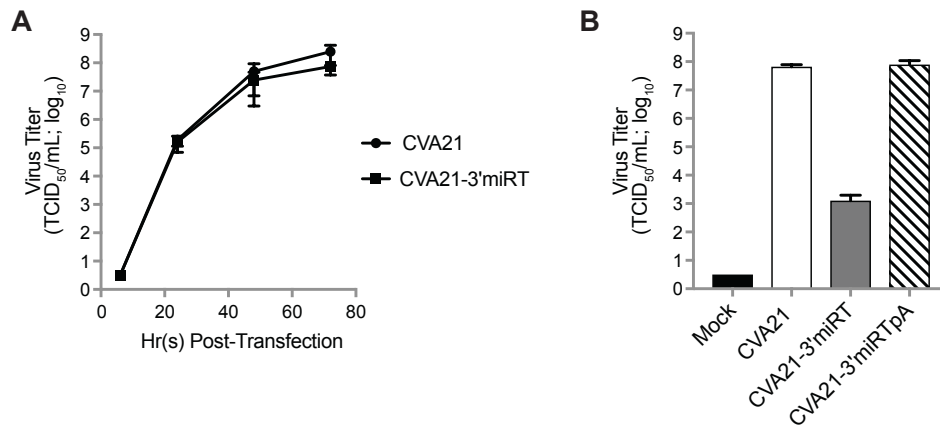

**Figure S1.** CVA21-3'miRT iRNA specific infectivity is temperature-sensitive and is improved with *in vitro* polyadenylation. **(A)** Infectious virus recovery time course in H1-HeLa cells at 32 °C. Cells were transfected with 1 µg of *in vitro*-derived RNA encoding CVA21 or CVA21-3' miRT genomes. Samples were collected at various times post transfection and infectious virus titrated. The experiment was run in quadruplicate and the data is represented as mean viral titers +/- standard error. **(B)** H1-HeLa cells were transfected with 1 µg of *in vitro*-derived RNA encoding CVA21, CVA21-3' miRT, or polyadenylated CVA21-3' miRT (pA). Recovered viruses were passaged twice in H1-HeLa cells and the cleared stocks titrated. The experiment was run in duplicate and that data are represented as mean viral titer +/- standard deviation.

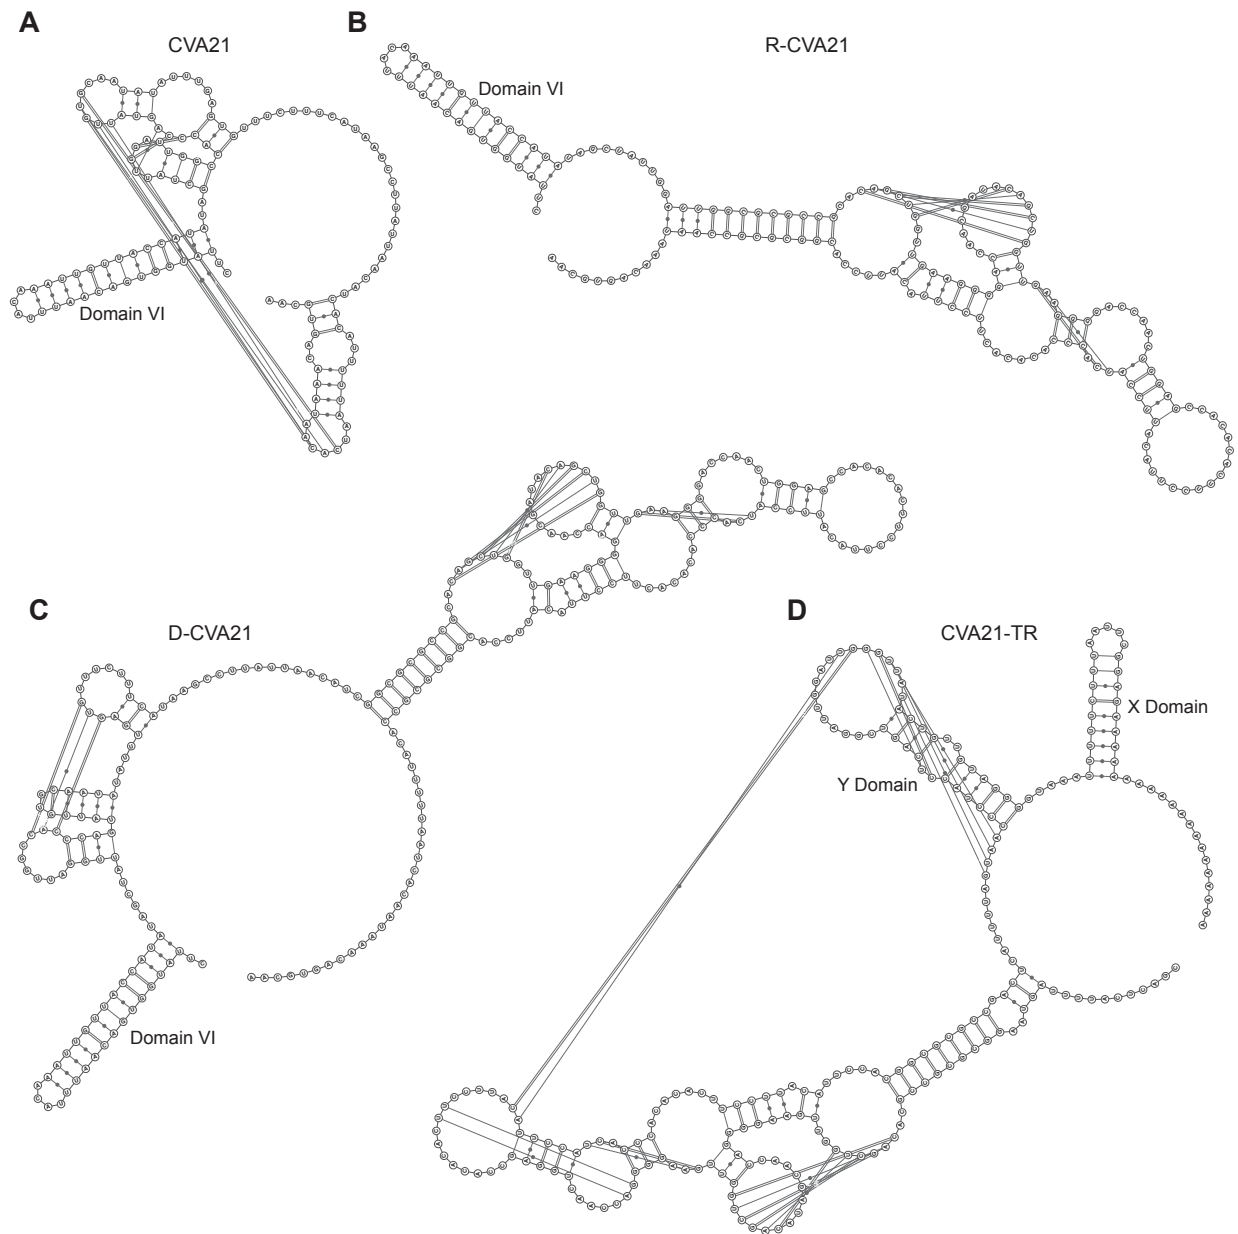

**Figure S2.** Predicted secondary RNA structures of microRNA-detargeted CVA21 NCRs. Predicted pseudoknot interactions are depicted by lines. Predictions of structures of the regions spanning domain VI and the downstream spacer in the 5' NCR for CVA21 (**A**), R-CVA21 (**B**), D-CVA21 (**C**), or the 3' NCR of CVA21-TR (**D**).

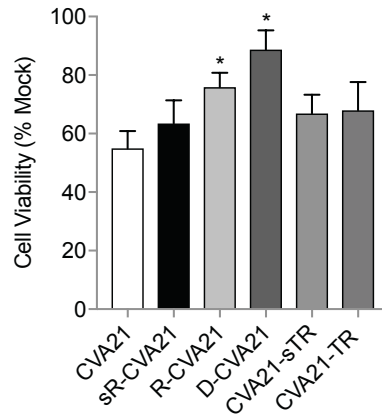

**Figure S3.** *In vitro* characterization of microRNA-detargeting efficacy in differentiated primary human skeletal muscle cells. Primary human skeletal muscle cells were incubated in differentiation media for 96 hrs. Differentiated cells were infected with unmodified or miRT-CVA21 at an MOI of 1. Cell viability was measured at 48 hrs post infection. This experiment was repeated in triplicate and the data are represented as mean cell viability +/- standard deviations. \*p < 0.05 compared to CVA21 infection was considered significant.

| Virus     | X         | Y       | Level       | -Level         | Score Mean | Std Err Diff | Z        | p-Value | Hodges-Lehmann | Lower CL | Upper CL | Difference Plot | Median   | Significant |
|-----------|-----------|---------|-------------|----------------|------------|--------------|----------|---------|----------------|----------|----------|-----------------|----------|-------------|
| CVA21     | Condition | % Alive | miR142      | Mock Infection | 1.6        | 1.914854     | 0.835573 | 0.8191  | 1.36209        | -3.98812 | 8.547545 | 1.3620885       | 3.156059 | N           |
| CVA21     | Condition | % Alive | miR-133     | Mock Infection | 0.4        | 1.914854     | 0.208893 | 0.9987  | 0.30378        | -4.43435 | 5.277986 | 0.3037818       | 4.858669 | N           |
| CVA21     | Condition | % Alive | miR-206     | Mock Infection | -0.4       | 1.914854     | -0.20889 | 0.9987  | -0.11628       | -4.74996 | 5.307162 | -0.1162759      | 4.96664  | N           |
| CVA21     | Condition | % Alive | Combination | Mock Infection | 0.4        | 1.914854     | 0.208893 | 0.9987  | 1.20778        | -4.12101 | 6.503142 | 1.2077765       | 3.338805 | N           |
| sR-CVA21  | Condition | % Alive | miR142      | Mock Infection | 2          | 1.914854     | 1.044466 | 0.6792  | 1.66108        | -7.13336 | 10.09741 | 1.6610836       | 3.455054 | N           |
| sR-CVA21  | Condition | % Alive | miR-133     | Mock Infection | -1.6       | 1.914854     | -0.83557 | 0.8191  | -0.93815       | -18.0799 | 8.408737 | -0.9381508      | 5.747349 | N           |
| sR-CVA21  | Condition | % Alive | miR-206     | Mock Infection | -4.8       | 1.914854     | -2.50672 | 0.0421  | -42.10847      | -109.464 | -22.8808 | -42.108469      | 47.22461 | Y           |
| sR-CVA21  | Condition | % Alive | Combination | Mock Infection | -4.8       | 1.914854     | -2.50672 | 0.0421  | -67.01642      | -87.9534 | -44.3064 | -67.016417      | 72.13255 | Y           |
| R-CVA21   | Condition | % Alive | miR142      | Mock Infection | 0          | 1.914854     | 0        | 1       | 0.34846        | -3.83397 | 6.130802 | 0.3484557       | 4.102876 | N           |
| R-CVA21   | Condition | % Alive | miR-133     | Mock Infection | -4.8       | 1.914854     | -2.50672 | 0.0421  | -15.84674      | -38.4094 | -5.07339 | -15.846737      | 18.7038  | Y           |
| R-CVA21   | Condition | % Alive | miR-206     | Mock Infection | -4.8       | 1.914854     | -2.50672 | 0.0421  | -92.19014      | -101.639 | -41.3396 | -92.190139      | 95.0472  | Y           |
| R-CVA21   | Condition | % Alive | Combination | Mock Infection | -4.8       | 1.914854     | -2.50672 | 0.0421  | -67.40677      | -73.0015 | -16.2039 | -67.406772      | 70.47463 | Y           |
| D-CVA21   | Condition | % Alive | miR142      | Mock Infection | 0          | 1.914854     | 0        | 1       | 0.29485        | -5.22073 | 8.960566 | 0.2948469       | 4.302206 | N           |
| D-CVA21   | Condition | % Alive | miR-133     | Mock Infection | -3.6       | 1.914854     | -1.88004 | 0.1838  | -35.98738      | -61.8388 | 3.144034 | -35.987376      | 40.23144 | N           |
| D-CVA21   | Condition | % Alive | miR-206     | Mock Infection | -4.8       | 1.914854     | -2.50672 | 0.0421  | -106.95717     | -120.608 | -66.4003 | -106.95717      | 110.4039 | Y           |
| D-CVA21   | Condition | % Alive | Combination | Mock Infection | -4.8       | 1.914854     | -2.50672 | 0.0421  | -62.56788      | -86.0686 | -53.9022 | -62.567882      | 63.65272 | Y           |
| CVA21-sTR | Condition | % Alive | miR142      | Mock Infection | 0.4        | 1.914854     | 0.208893 | 0.9987  | 0.44849        | -3.43769 | 9.98751  | 0.4484926       | 3.372    | N           |
| CVA21-sTR | Condition | % Alive | miR-133     | Mock Infection | -3.2       | 1.914854     | -1.67115 | 0.2743  | -5.56374       | -15.4224 | 3.986601 | -5.5637443      | 8.27973  | N           |
| CVA21-sTR | Condition | % Alive | miR-206     | Mock Infection | -4.8       | 1.914854     | -2.50672 | 0.0421  | -44.88248      | -55.5044 | -11.4917 | -44.882478      | 55.82902 | Y           |
| CVA21-sTR | Condition | % Alive | Combination | Mock Infection | -4         | 1.914854     | -2.08893 | 0.1177  | -49.29266      | -60.8636 | 0.041527 | -49.292655      | 54.64134 | N           |
| CVA21-TR  | Condition | % Alive | miR142      | Mock Infection | 1.2        | 1.914854     | 0.62668  | 0.9246  | 1.12578        | -3.65968 | 7.313814 | 1.1257801       | 3.629468 | N           |
| CVA21-TR  | Condition | % Alive | miR-133     | Mock Infection | -2.4       | 1.914854     | -1.25336 | 0.5295  | -3.45313       | -10.1213 | 3.006561 | -3.4531284      | 6.96632  | N           |
| CVA21-TR  | Condition | % Alive | miR-206     | Mock Infection | -2.4       | 1.914854     | -1.25336 | 0.5295  | -3.81484       | -25.0441 | 3.347083 | -3.8148401      | 4.983251 | N           |
| CVA21-TR  | Condition | % Alive | Combination | Mock Infection | -2         | 1.914854     | -1.04447 | 0.6792  | -3.23346       | -63.1956 | 3.928463 | -3.2334609      | 5.423438 | N           |

**Table S1.** Nonparametric Steel multiple comparisons with mock infection controls statistical analysis of microRNA targeting efficiency of samples described in Fig. 3A.
